# Supplementary material for: Design, Synthesis, and Antitumor Activity of Olmutinib Derivatives Containing Acrylamide Moiety
Source: MDPI journal article supplement (doi:10.3390/molecules26103041), 2021-05-20
Supplement: s1 [file s1]

# Design, Synthesis and Antitumor Activity of Olmutinib Derivatives Containing Acrylamide Moiety

Xiaohan Hu, Sheng Tang, Feiyi Yang, Pengwu Zheng, Shan Xu <sup>†</sup>, Qingshan Pan <sup>\*</sup> and Wufu Zhu <sup>\*</sup>

School of Pharmacy, Jiangxi Science & Technology Normal University, Nanchang 330013, China; huxiaohan1717@163.com (X.H.); shengtang\_1219@163.com (S.T.); 18380539689@163.com (F.Y.); Zhengpw@126.com (P.Z.); Shanxu9891@126.com (S.X.)

<sup>\*</sup> Correspondence: qingshan\_pan@hnu.edu.cn (Q.P.); zhuwufu-1122@163.com or zhuwf@jxstnu.edu.cn (W.Z.)

<sup>†</sup> Tel.: +86-791-8380-2393 (S.X.).

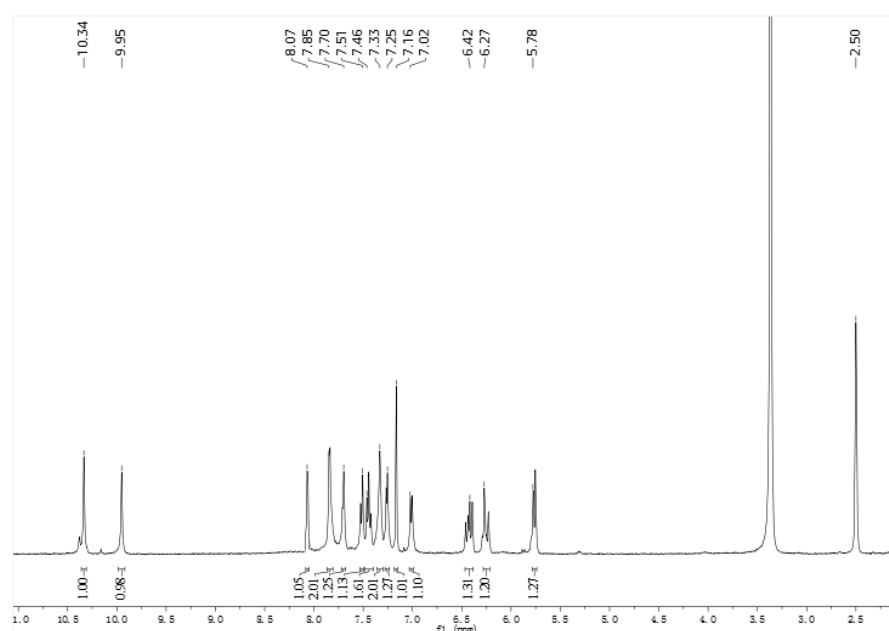

Figure S1. <sup>1</sup>H-NMR spectrum of compound H1.

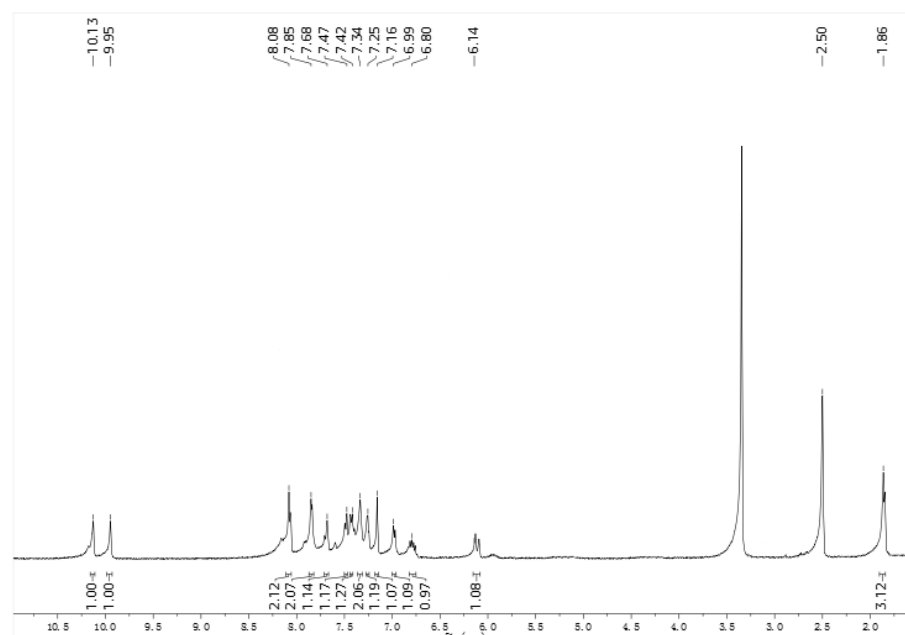

**Figure S2.**  $^1\text{H}$ -NMR spectrum of compound **H2**.

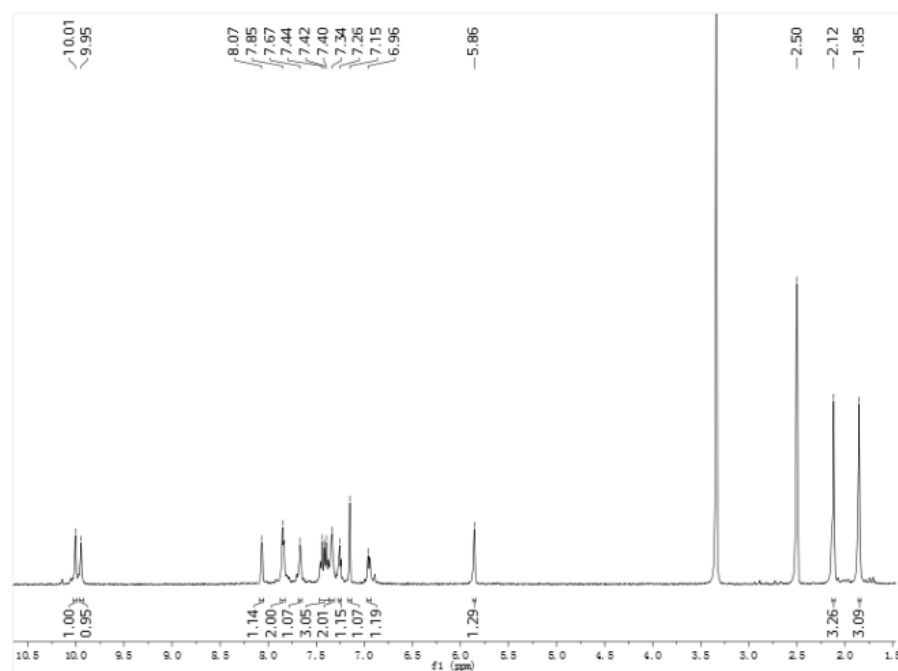

**Figure S3.**  $^1\text{H}$ -NMR spectrum of compound **H3**.

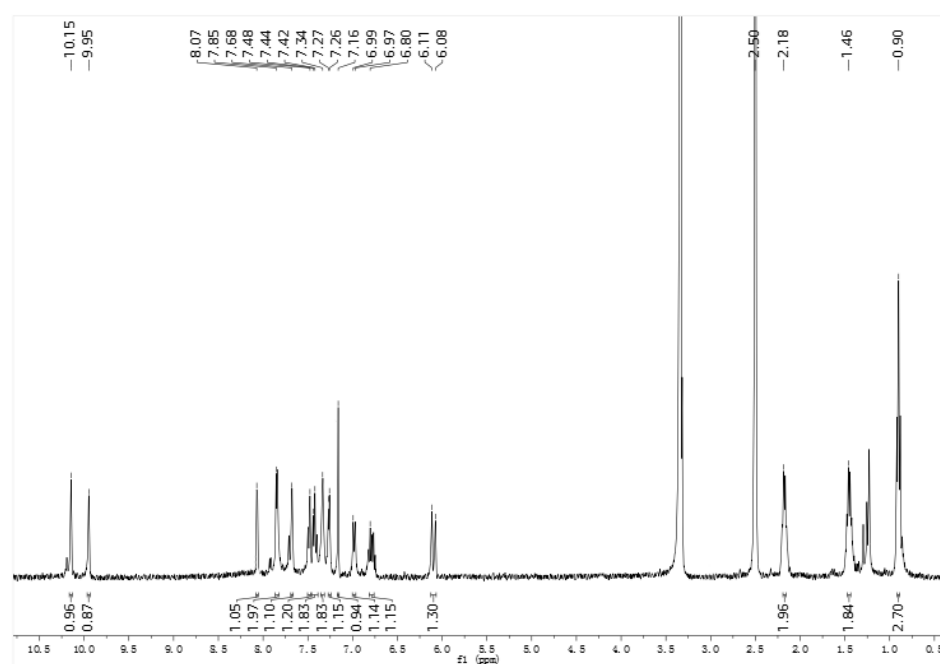

**Figure S4.**  $^1\text{H}$ -NMR spectrum of compound **H4**.

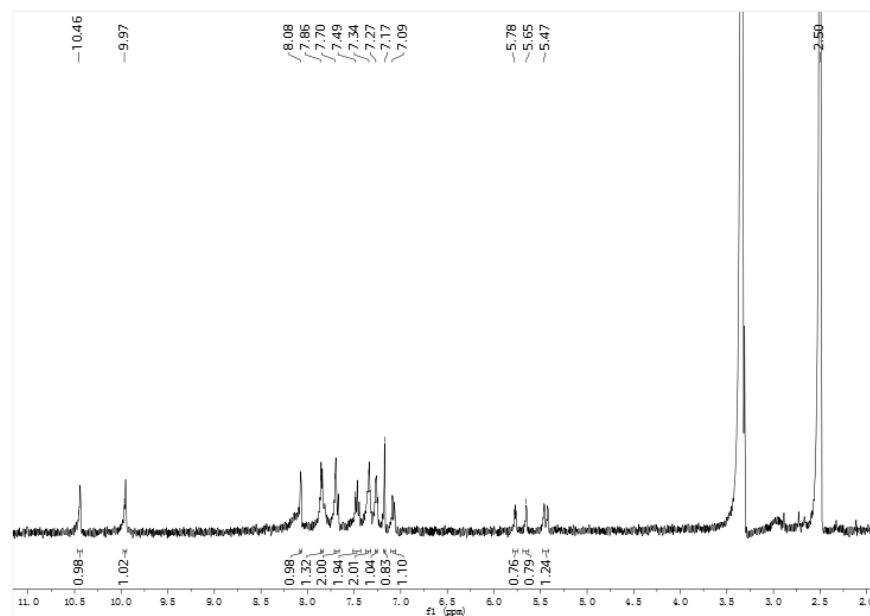

Figure S5. <sup>1</sup>H-NMR spectrum of compound H5.

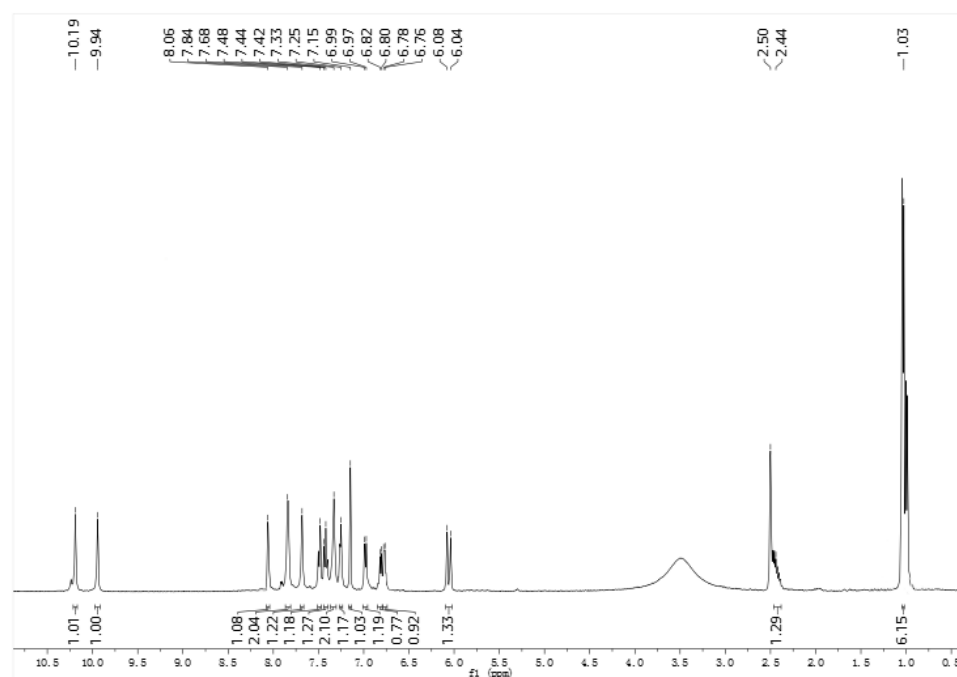

Figure S6. <sup>1</sup>H-NMR spectrum of compound H6.

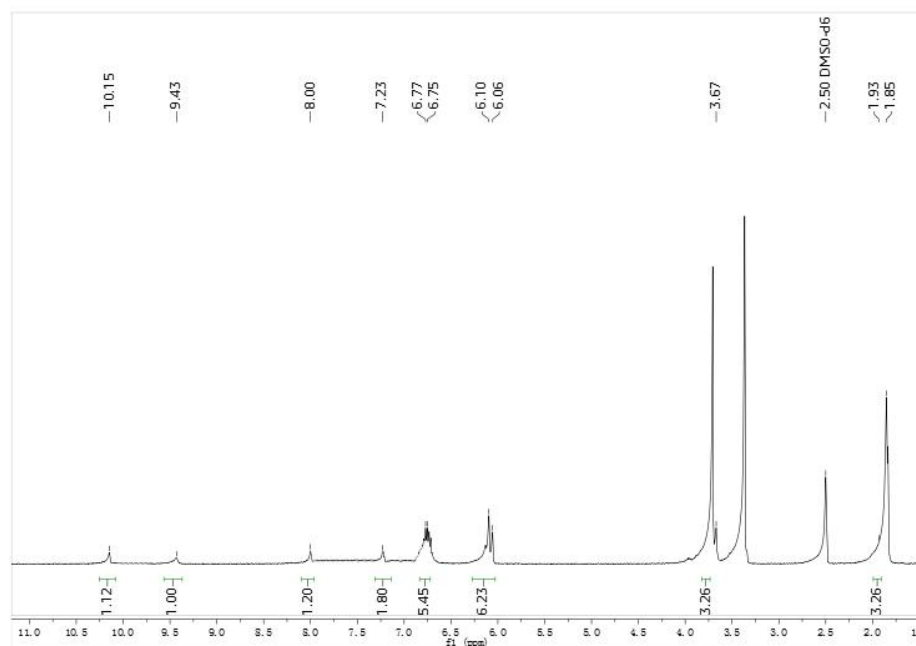

**Figure S7.** <sup>1</sup>H-NMR spectrum of compound H7.

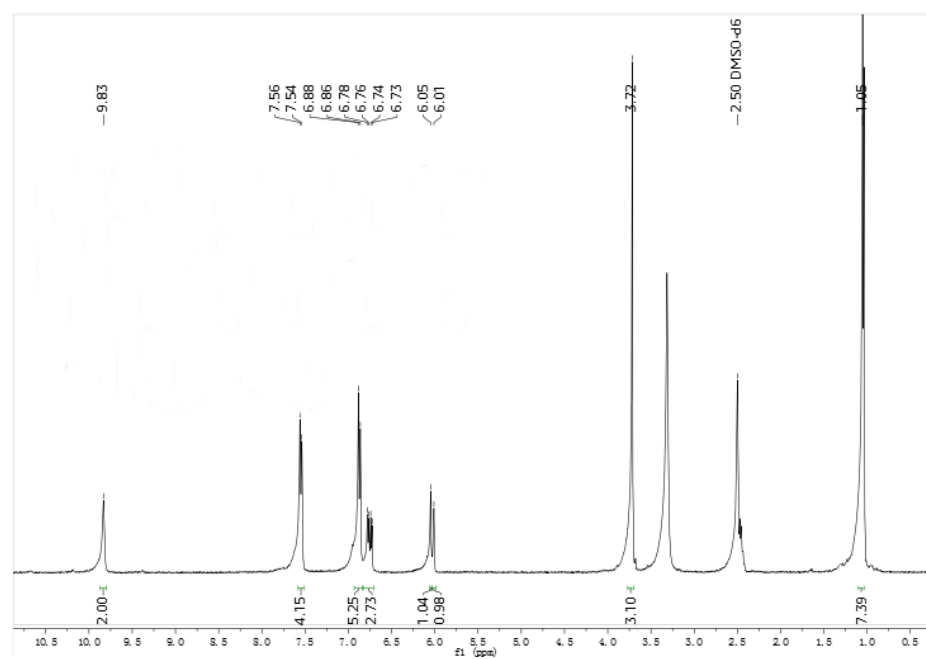

**Figure S8.** <sup>1</sup>H-NMR spectrum of compound H8.

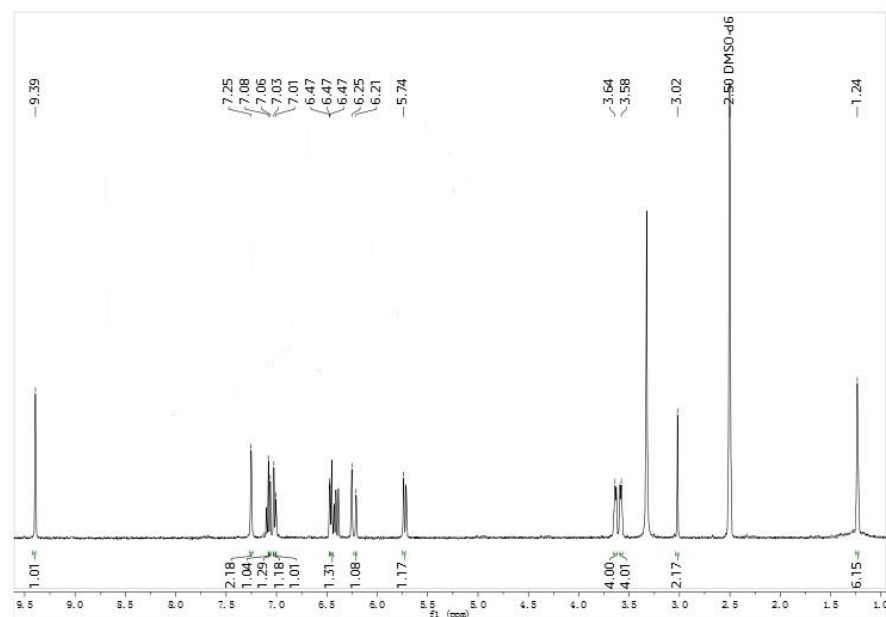

**Figure S9.** <sup>1</sup>H-NMR spectrum of compound **H9**.

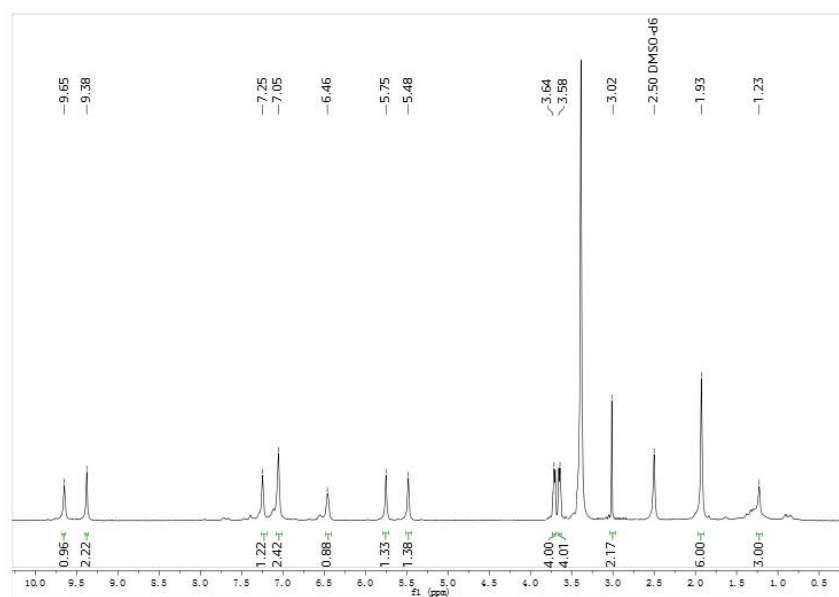

**Figure S10.** <sup>1</sup>H-NMR spectrum of compound **H10**.

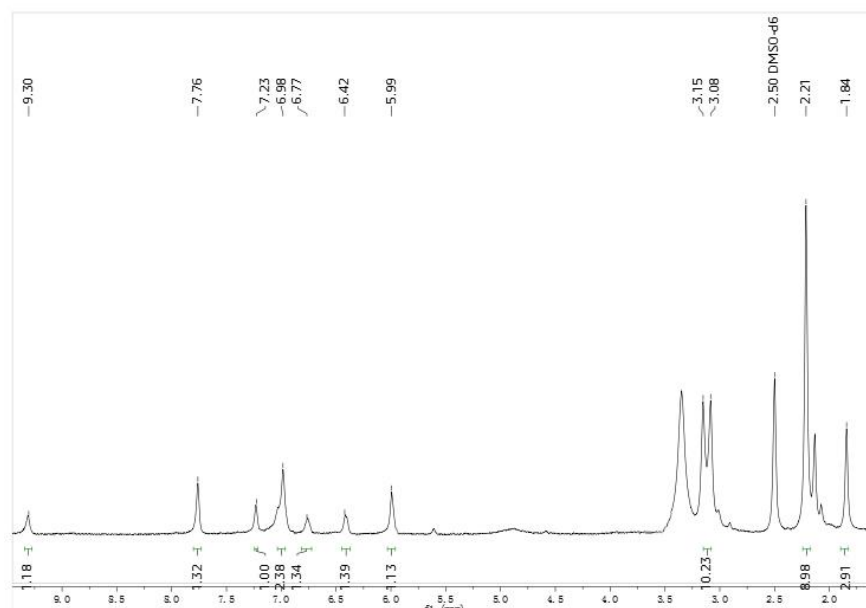

Figure S11. <sup>1</sup>H-NMR spectrum of compound H11.

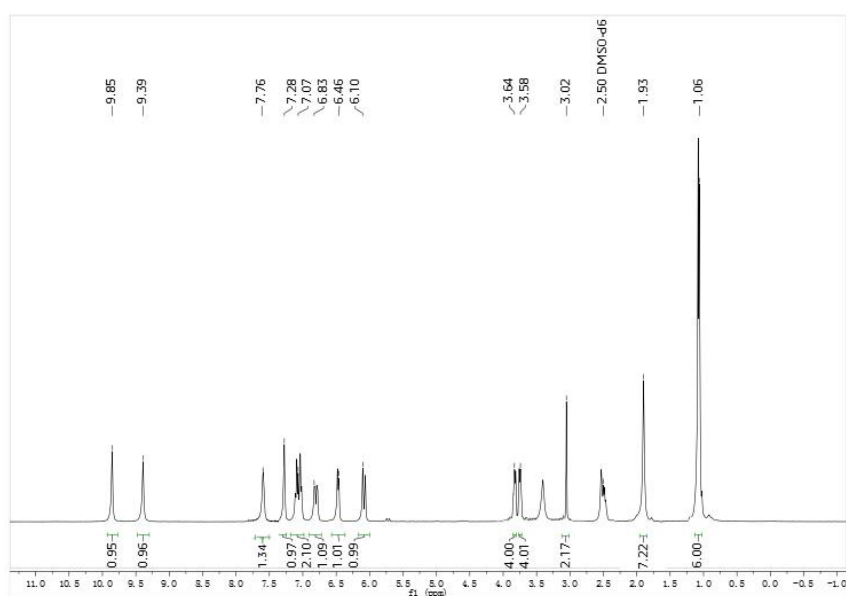

Figure S12. <sup>1</sup>H-NMR spectrum of compound H12.

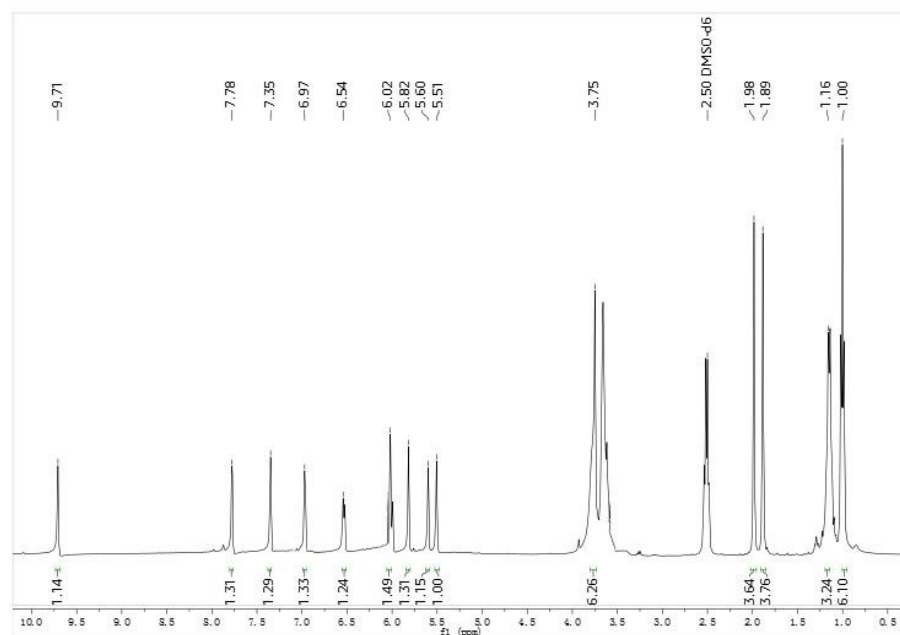

**Figure S13.** <sup>1</sup>H-NMR spectrum of compound H13.

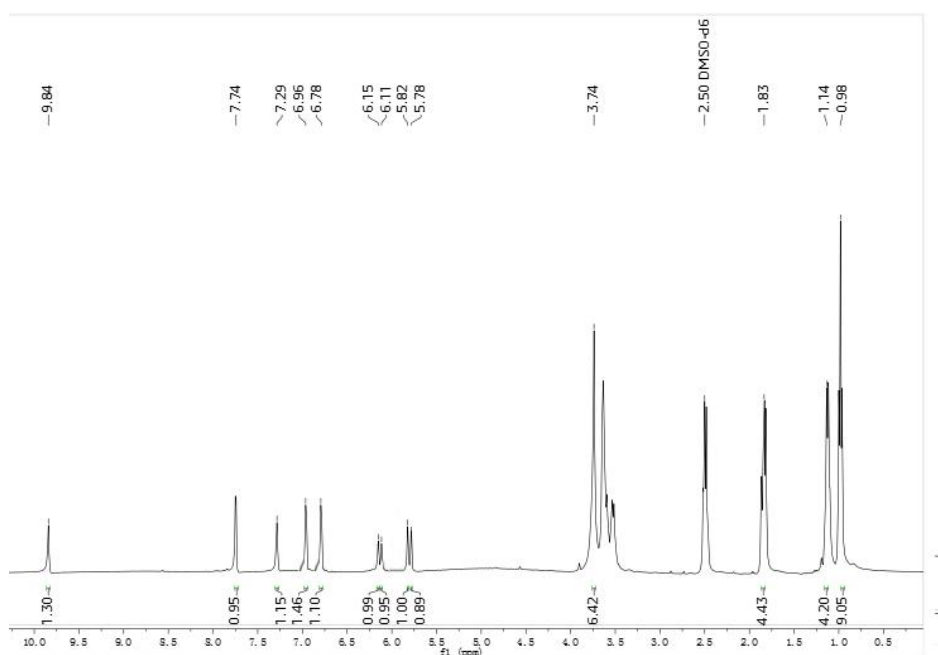

**Figure S14.** <sup>1</sup>H-NMR spectrum of compound H14.

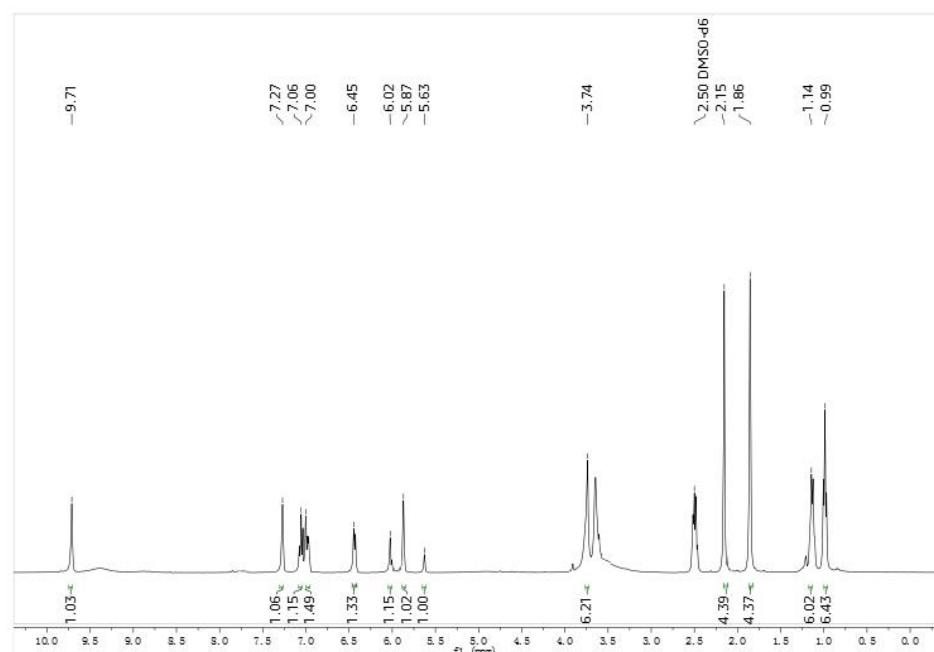

**Figure S15.** <sup>1</sup>H-NMR spectrum of compound H15.

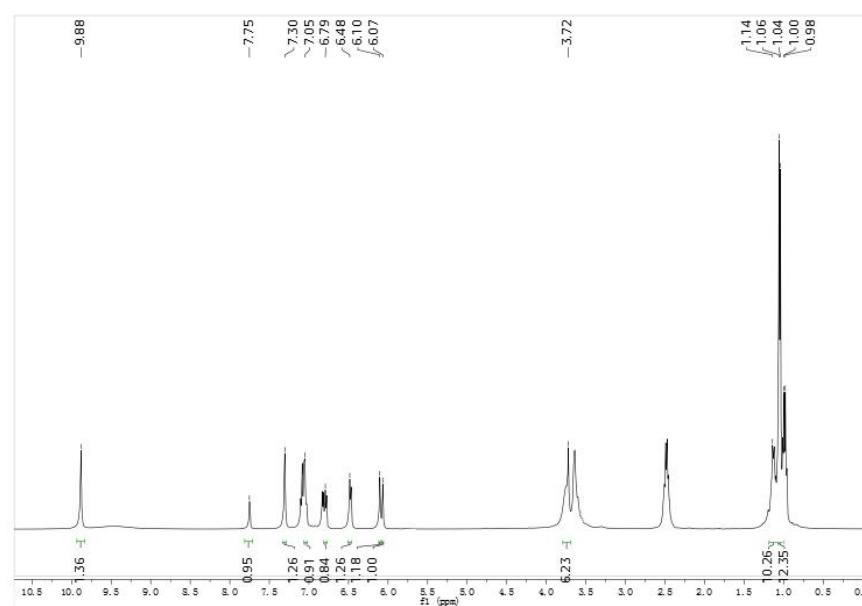

**Figure S16.** <sup>1</sup>H-NMR spectrum of compound H16.



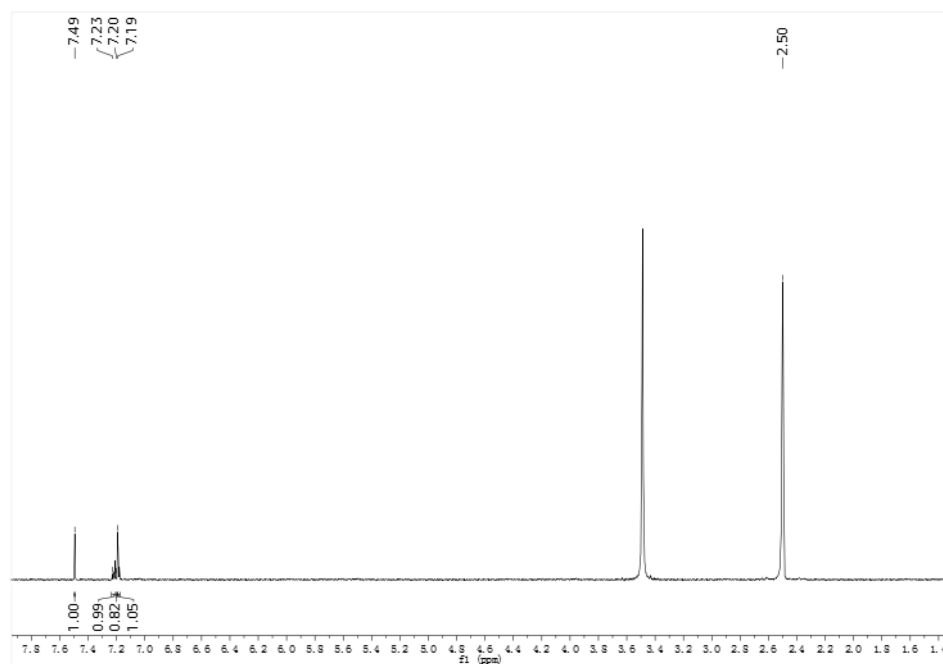

**Figure S17.** <sup>1</sup>H-NMR spectrum of compound 8.

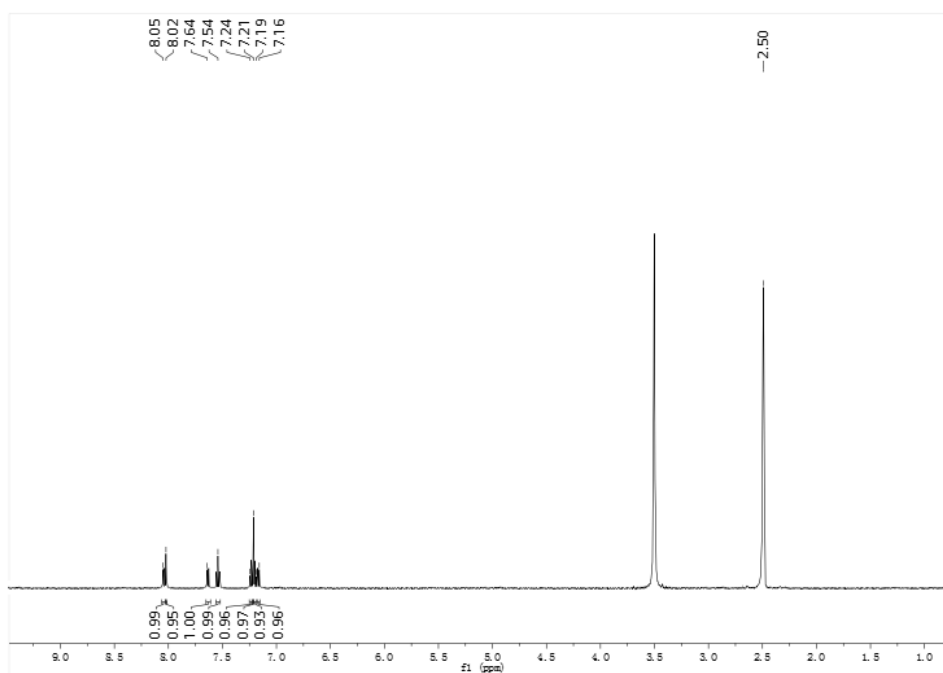

**Figure S18.** <sup>1</sup>H-NMR spectrum of compound 9.

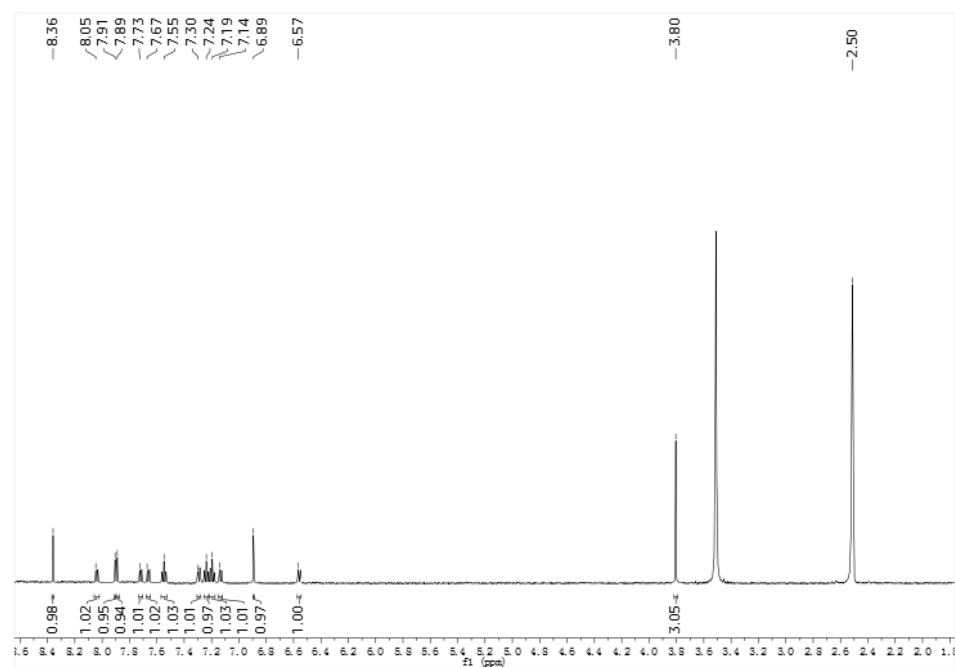

Figure S19.  $^1\text{H}$ -NMR spectrum of compound 10a.

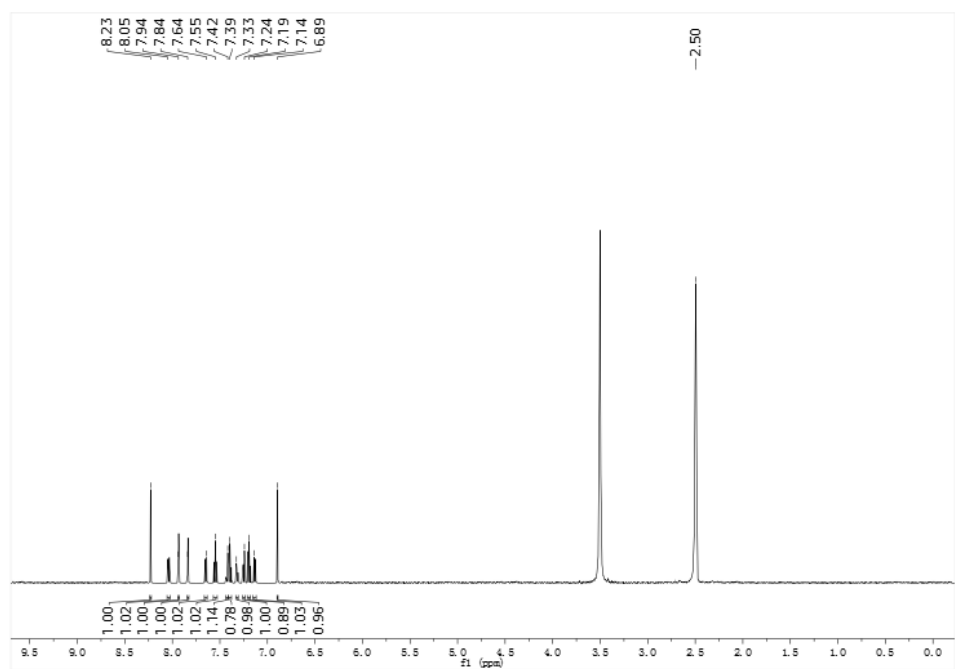

Figure S20.  $^1\text{H}$ -NMR spectrum of compound 10b.

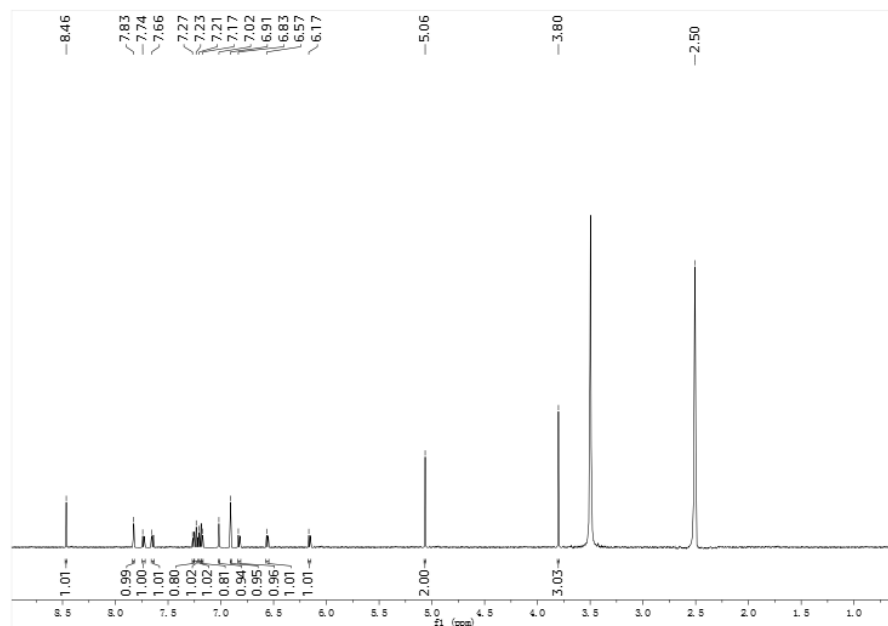

Figure S21. <sup>1</sup>H-NMR spectrum of compound 11a.

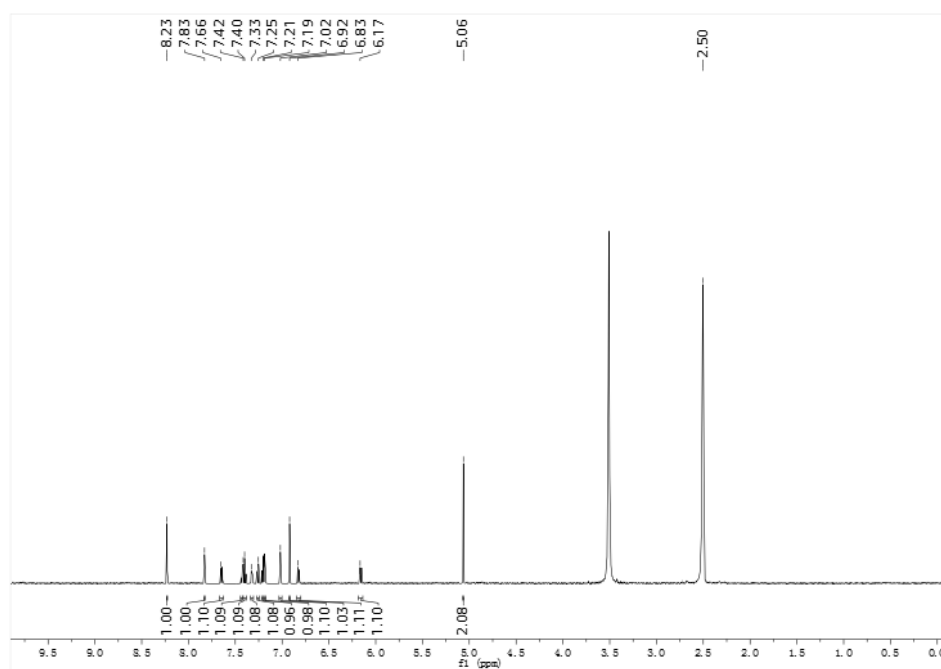

Figure S22. <sup>1</sup>H-NMR spectrum of compound 11b.

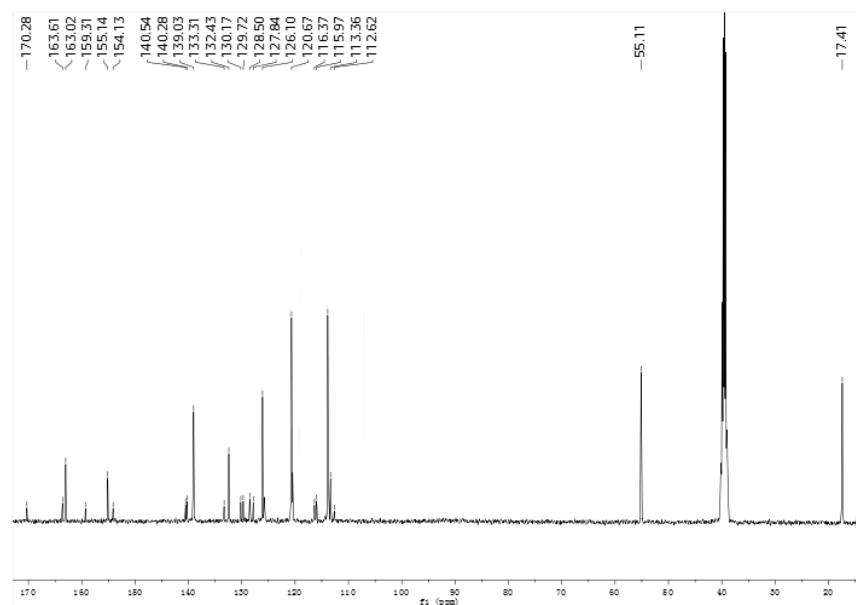

**Figure S23.** <sup>13</sup>C-NMR spectrum of compound H7.

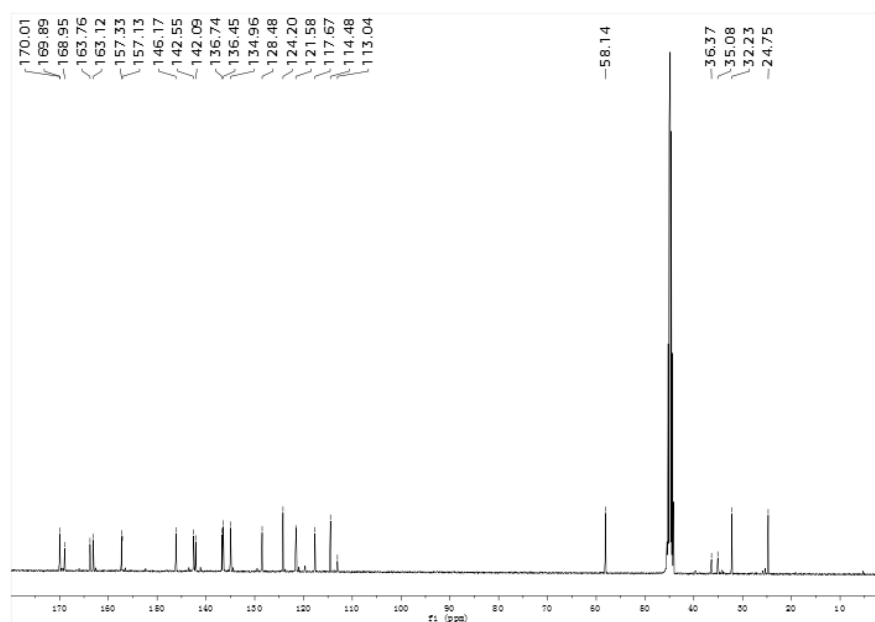

**Figure S24.** <sup>13</sup>C-NMR spectrum of compound H10.

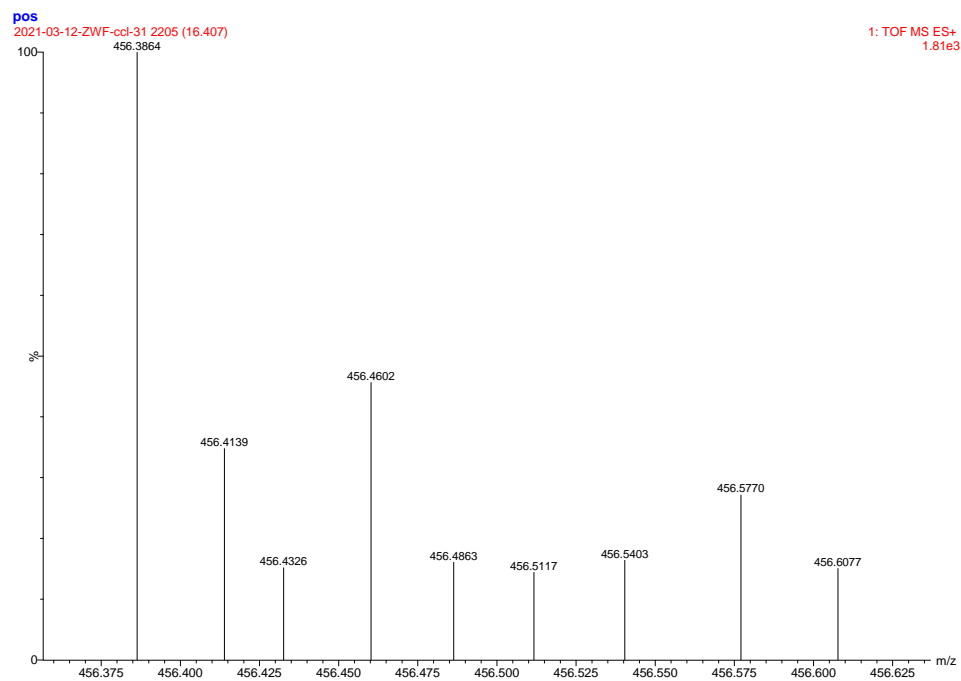

Figure S25. TOF MS of compound H1.

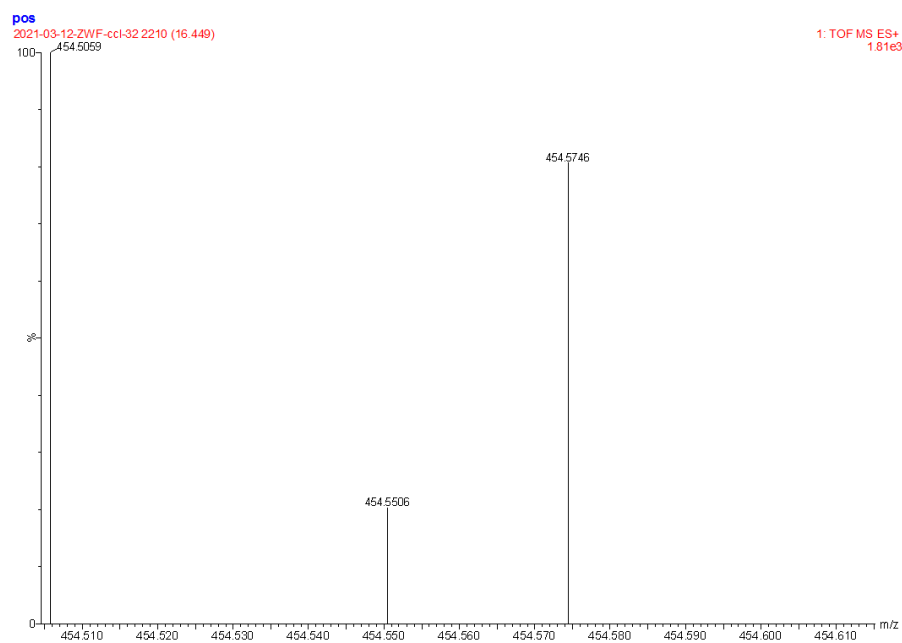

Figure S26. TOF MS of compound H2.

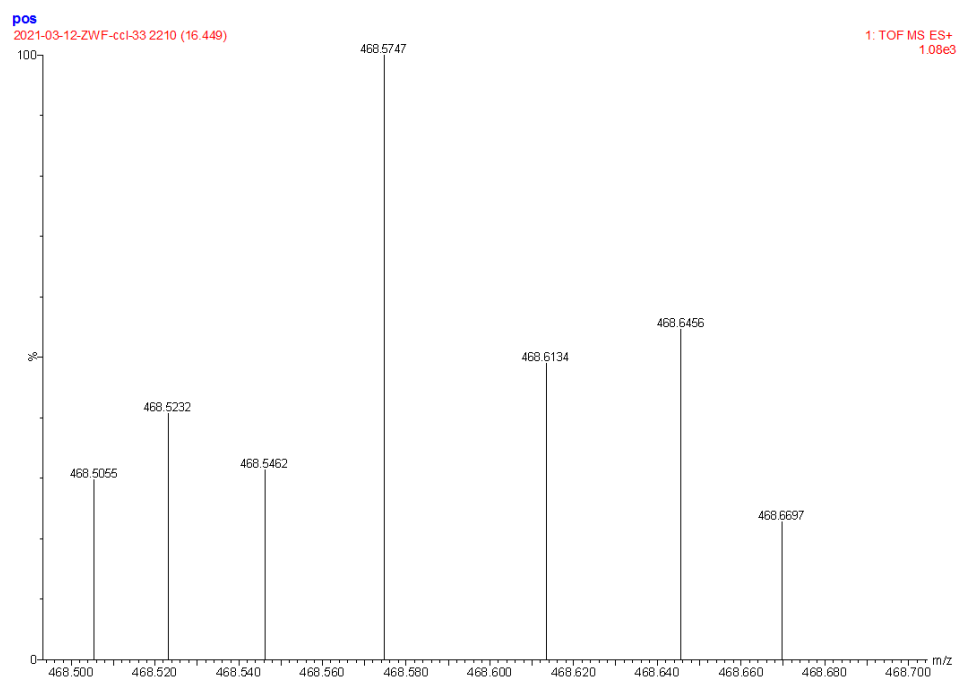

Figure S27. TOF MS of compound H3.

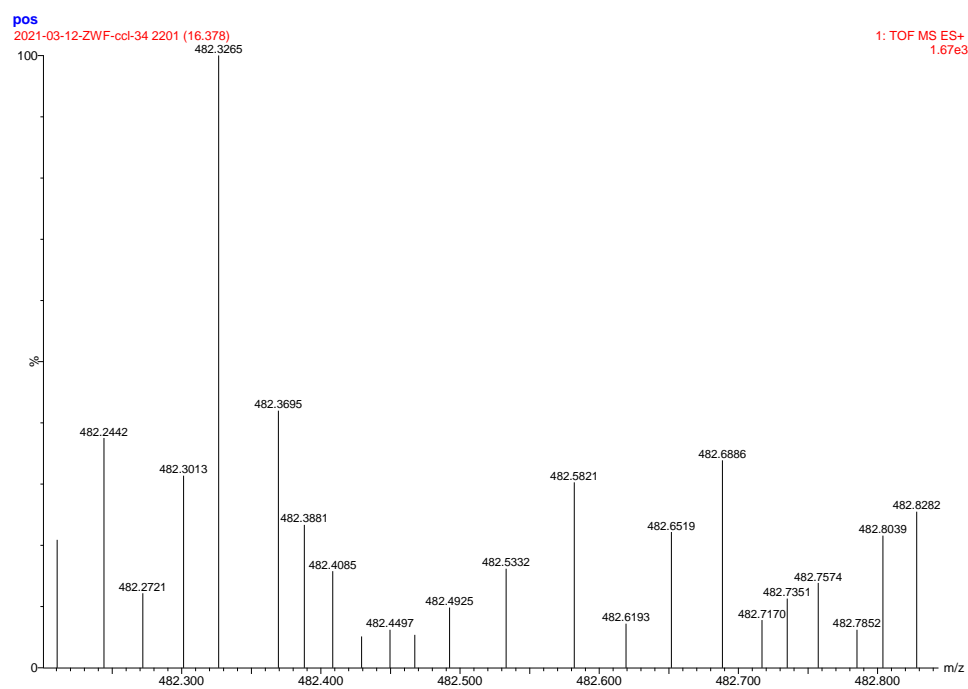

Figure S28. TOF MS of compound H4.

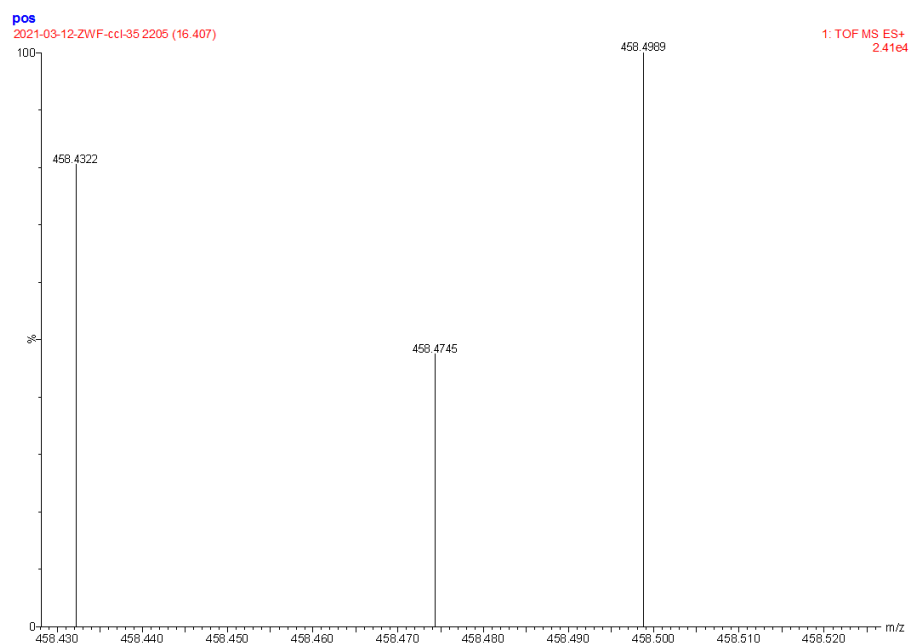

Figure S29. TOF MS of compound H5.

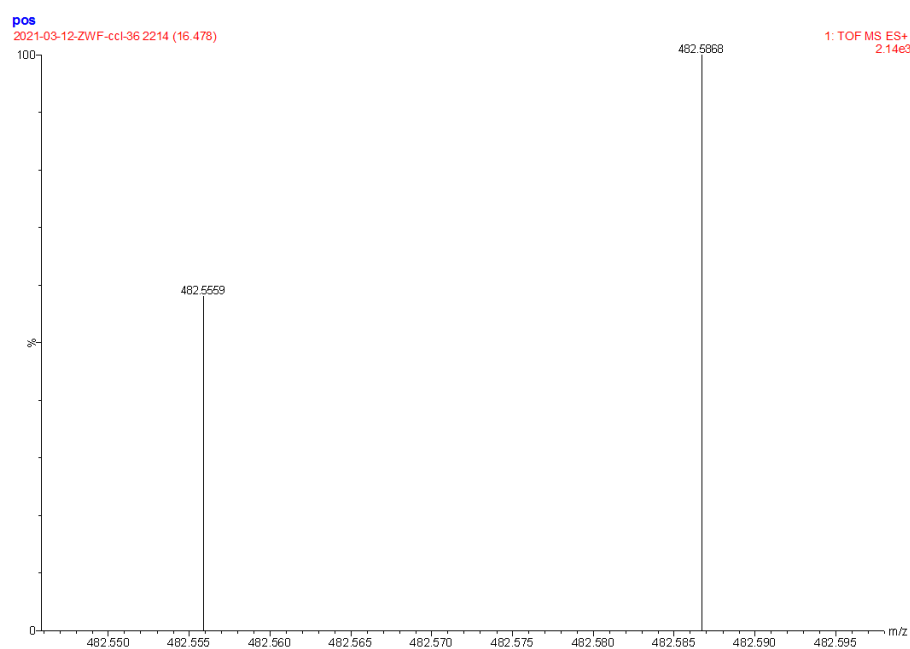

Figure S30. TOF MS of compound H6.

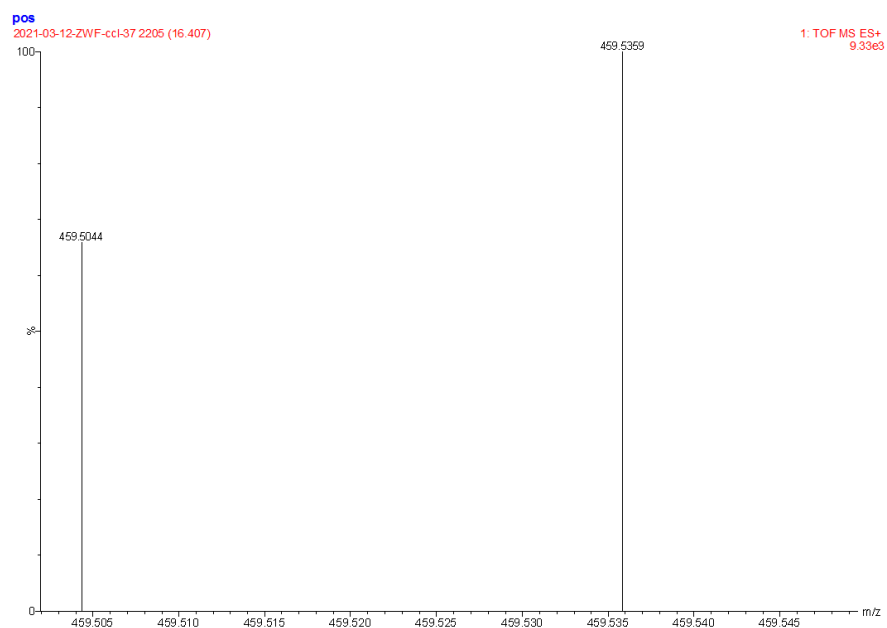

**Figure S31.** TOF MS of compound **H7**.

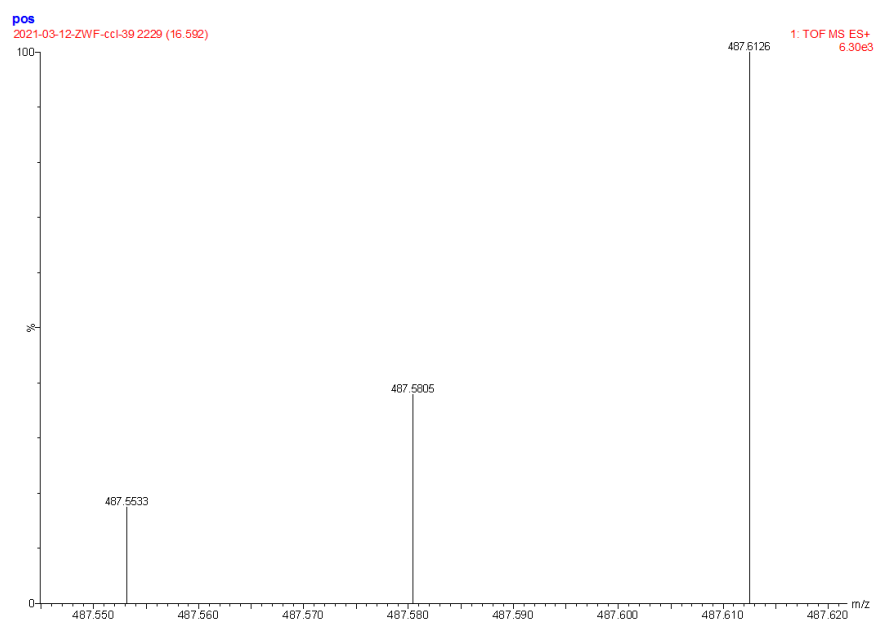

**Figure S32.** TOF MS of compound **H8**.



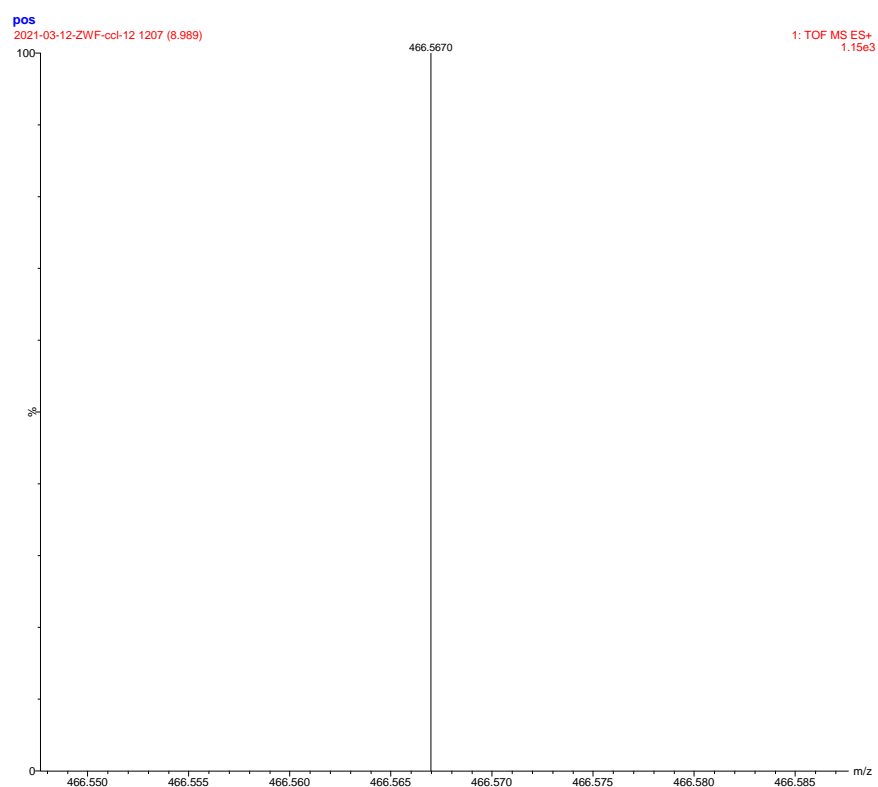

**Figure S33.** TOF MS of compound **H9**.

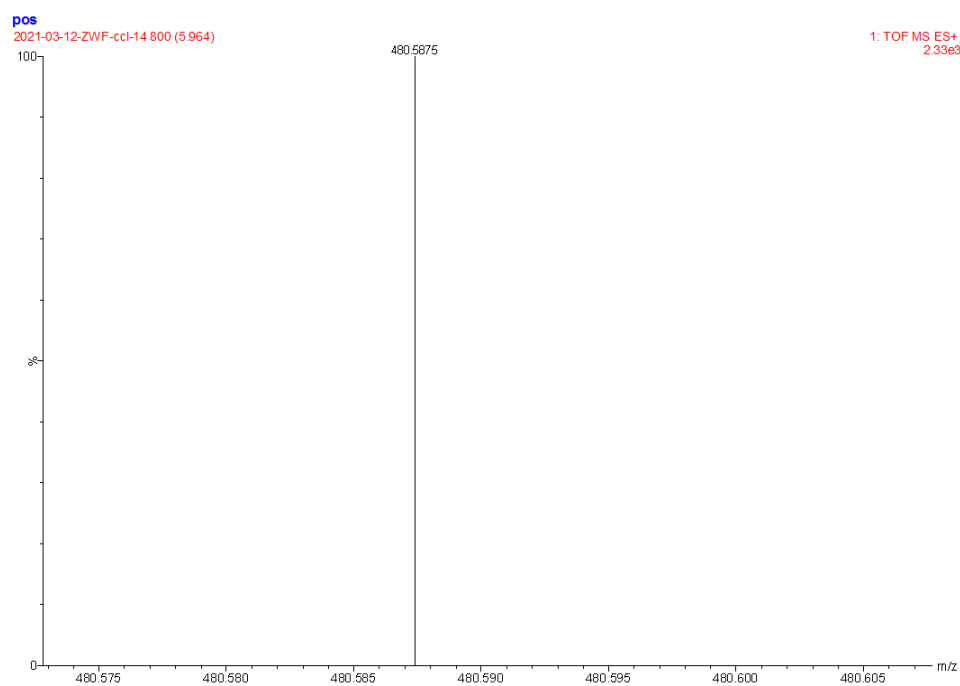

**Figure S34.** TOF MS of compound **H10**.

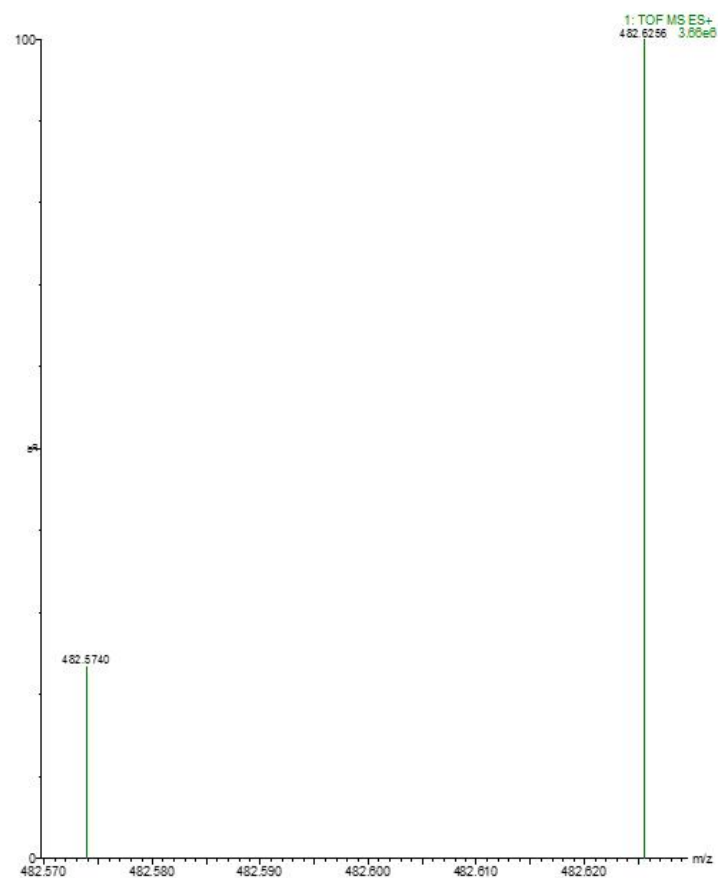

Figure S35. TOF MS of compound H11.

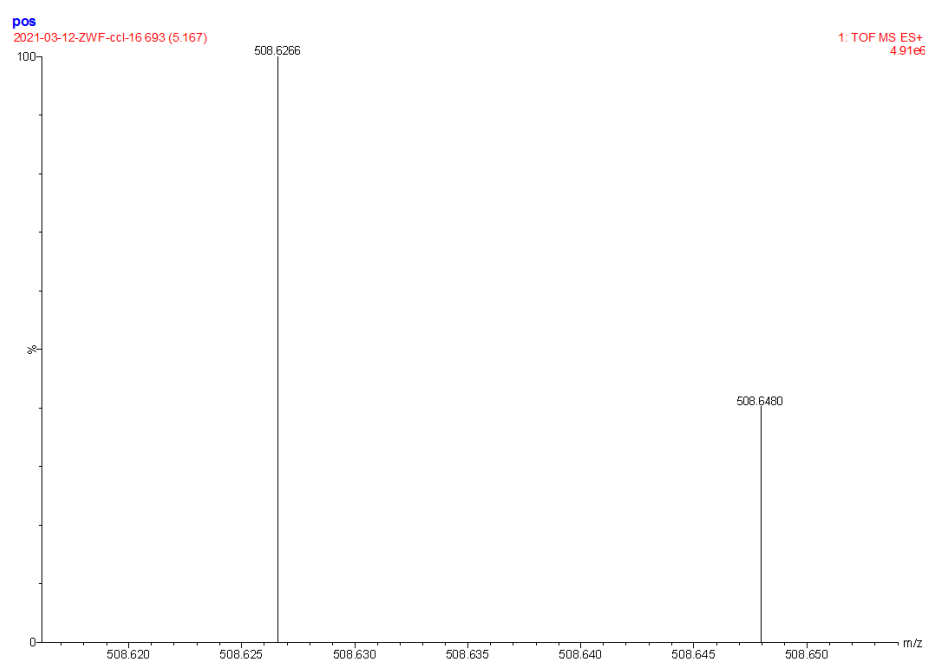

Figure S36. TOF MS of compound H12.

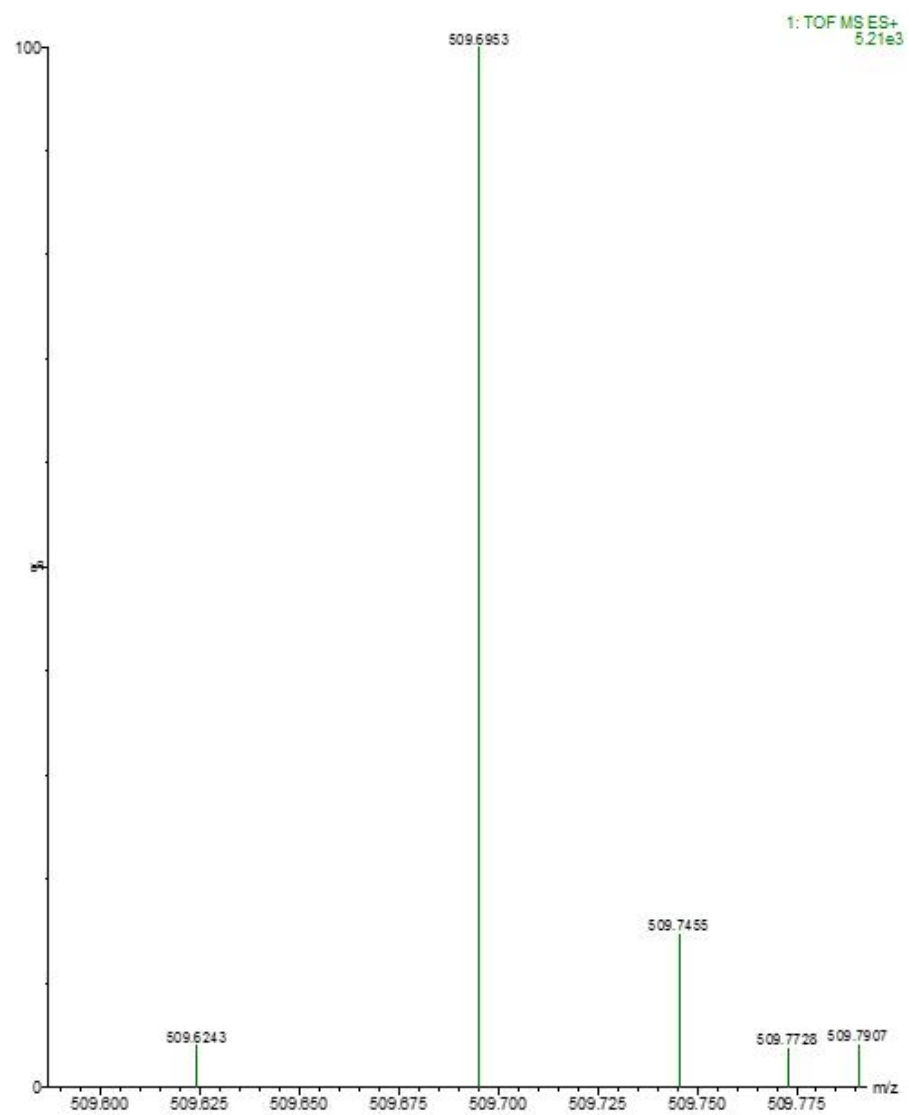

Figure S37. TOF MS of compound H13.

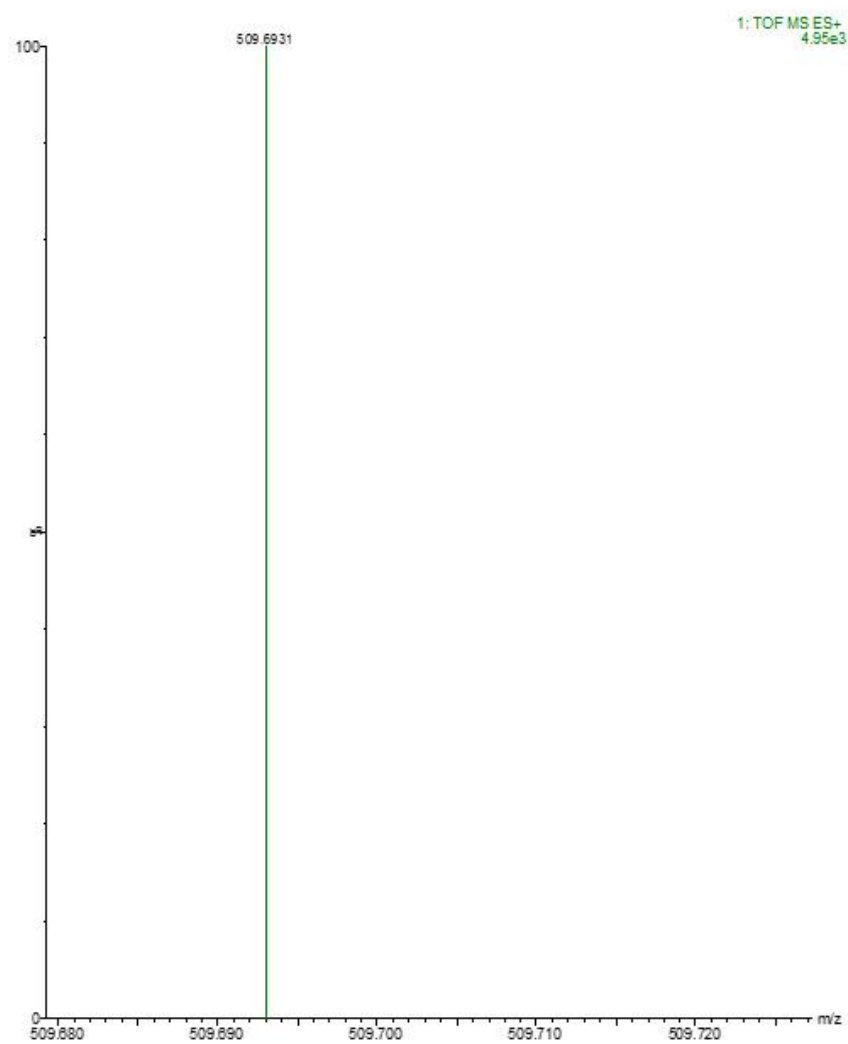

**Figure S38.** TOF MS of compound **H14**.

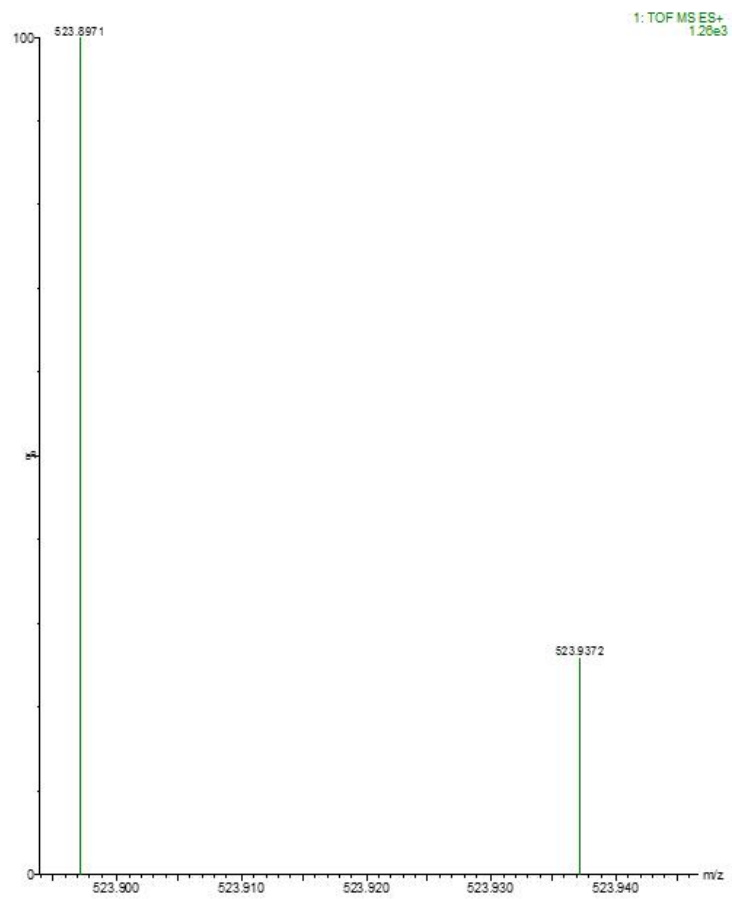

**Figure S39.** TOF MS of compound H15.

pos

2021-03-12-ZWF-cc1-23 984 (7.331)

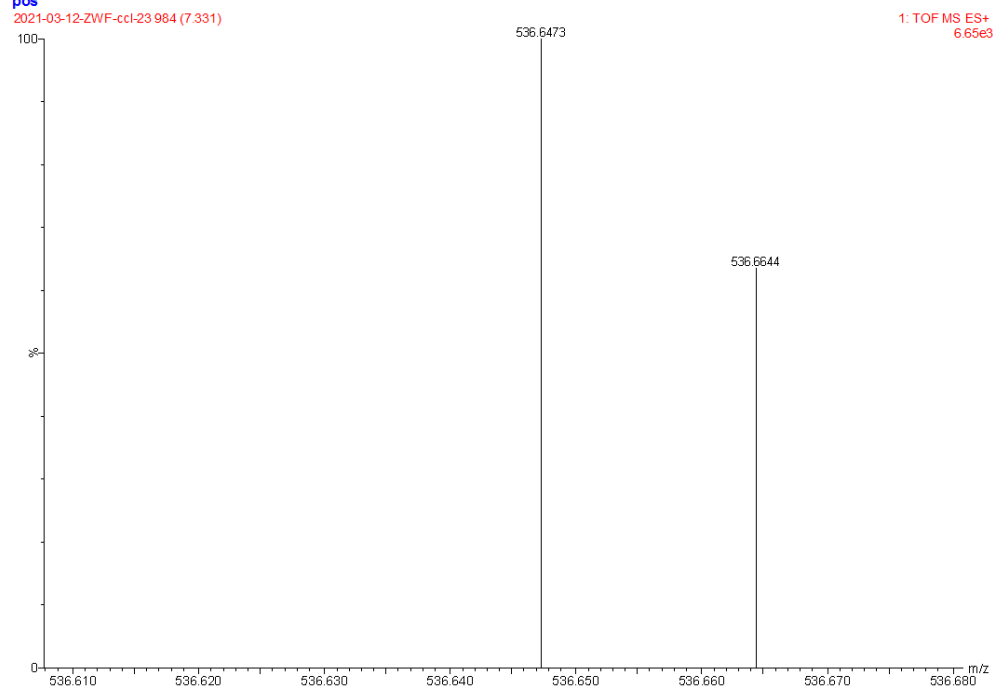

**Figure S40.** TOF MS of compound H16.

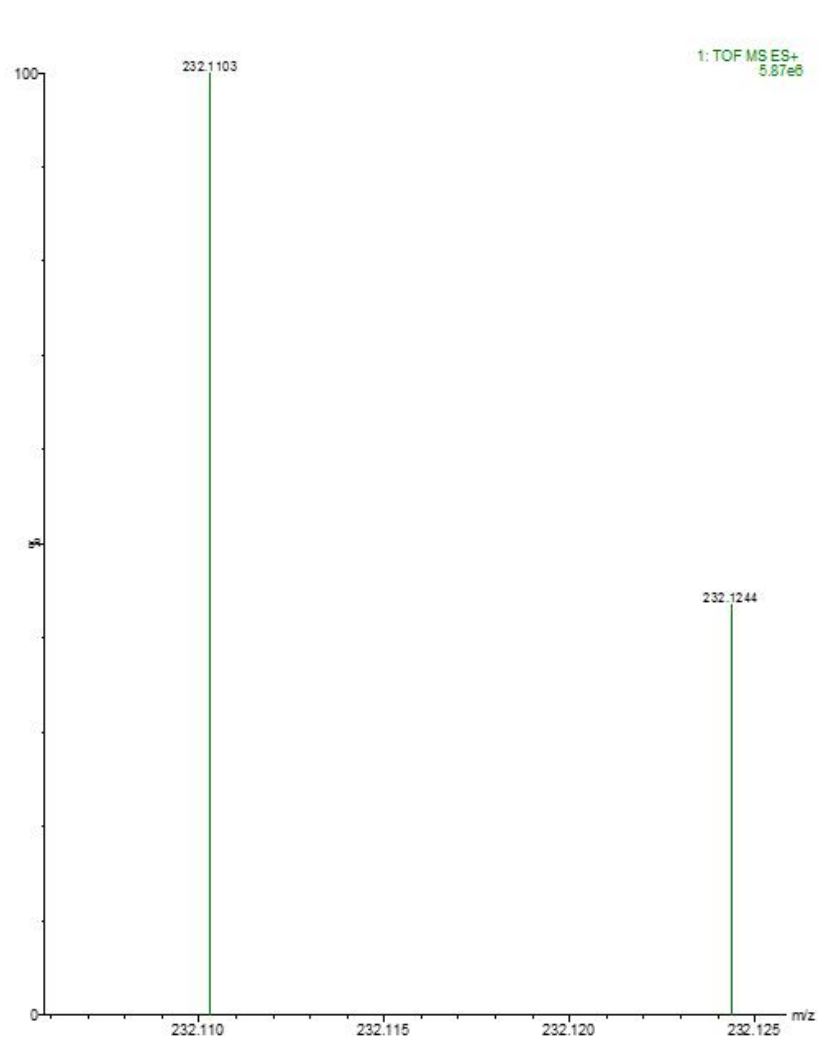

**Figure S41.** TOF MS of compound 8.

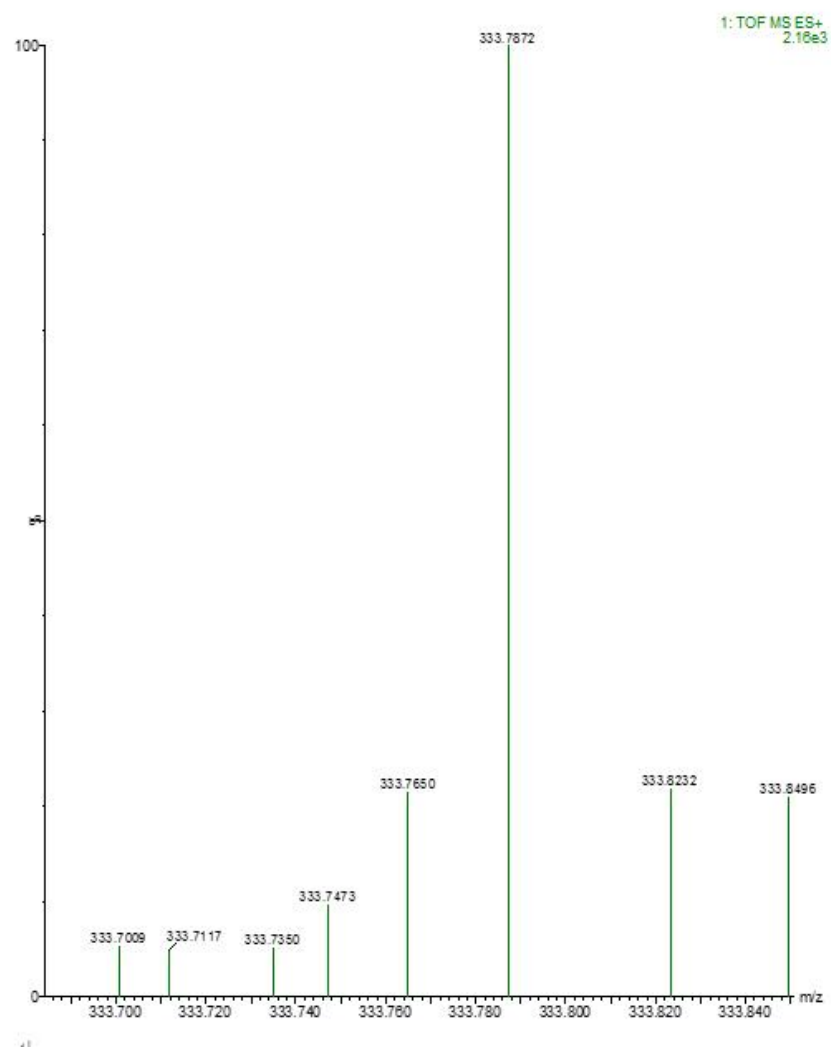

Figure S42. TOF MS of compound 9.

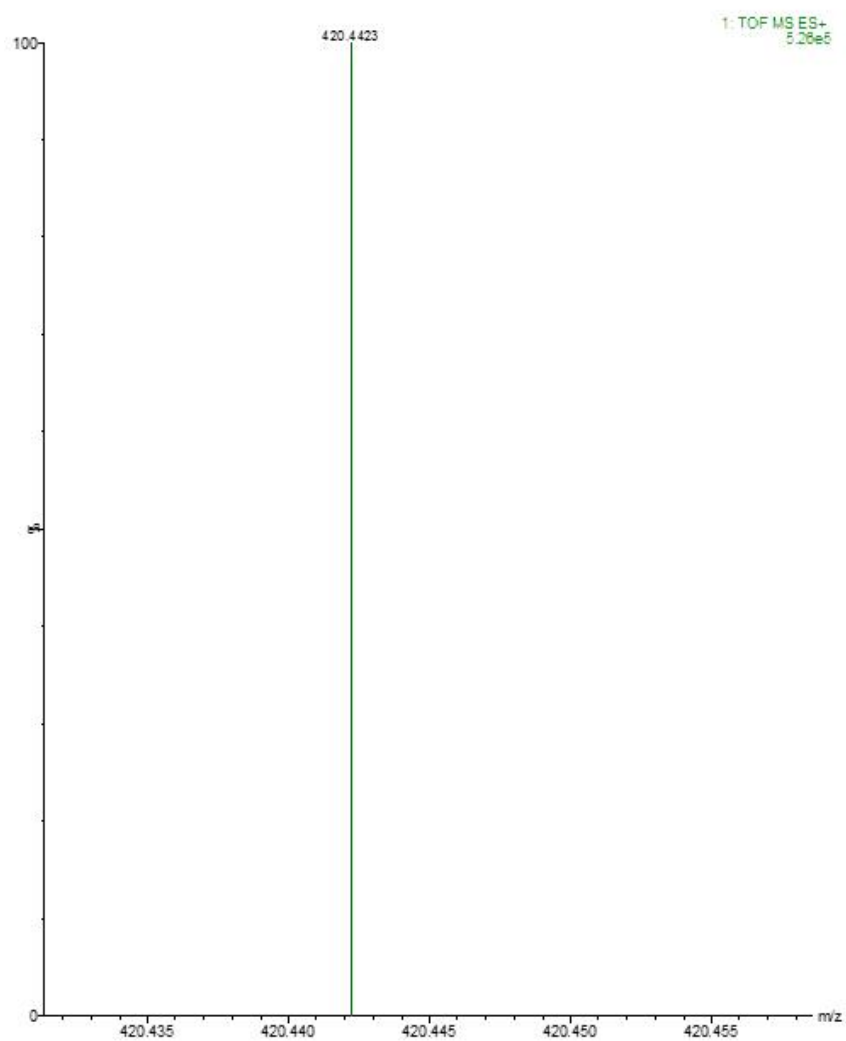

**Figure S43.** TOF MS of compound **10a**.



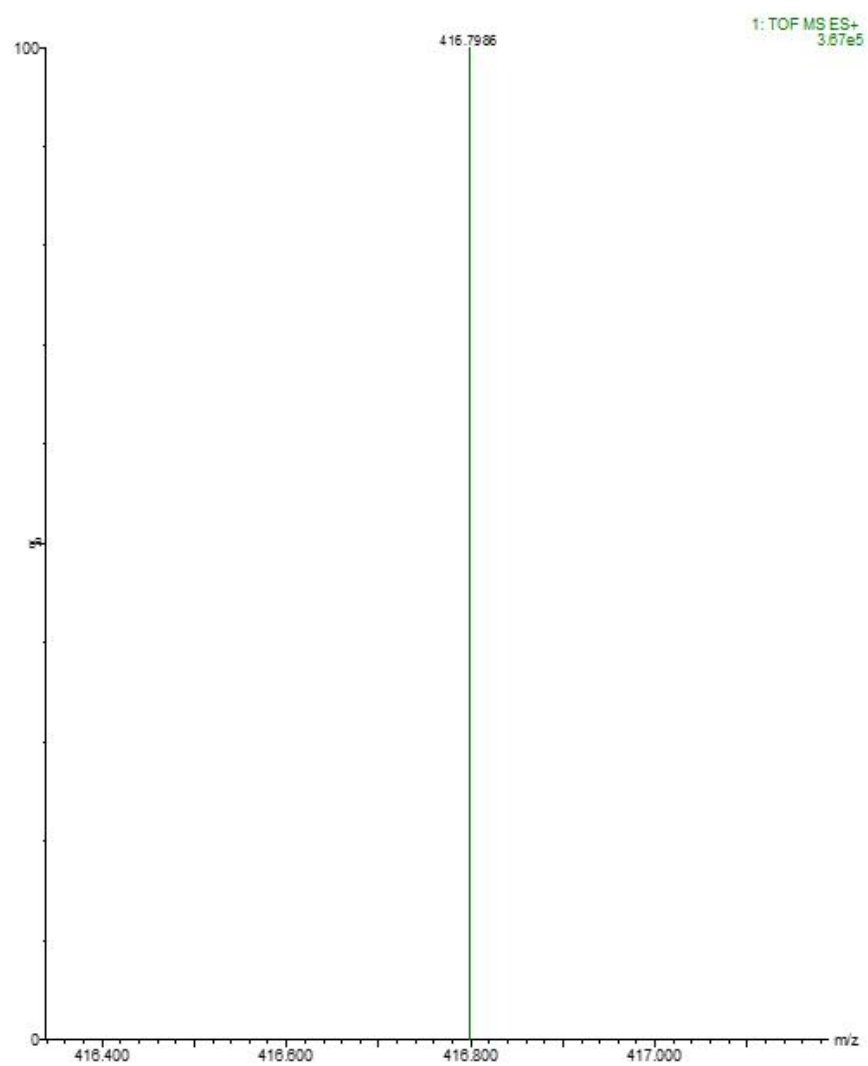

**Figure S44.** TOF MS of compound **10b**.

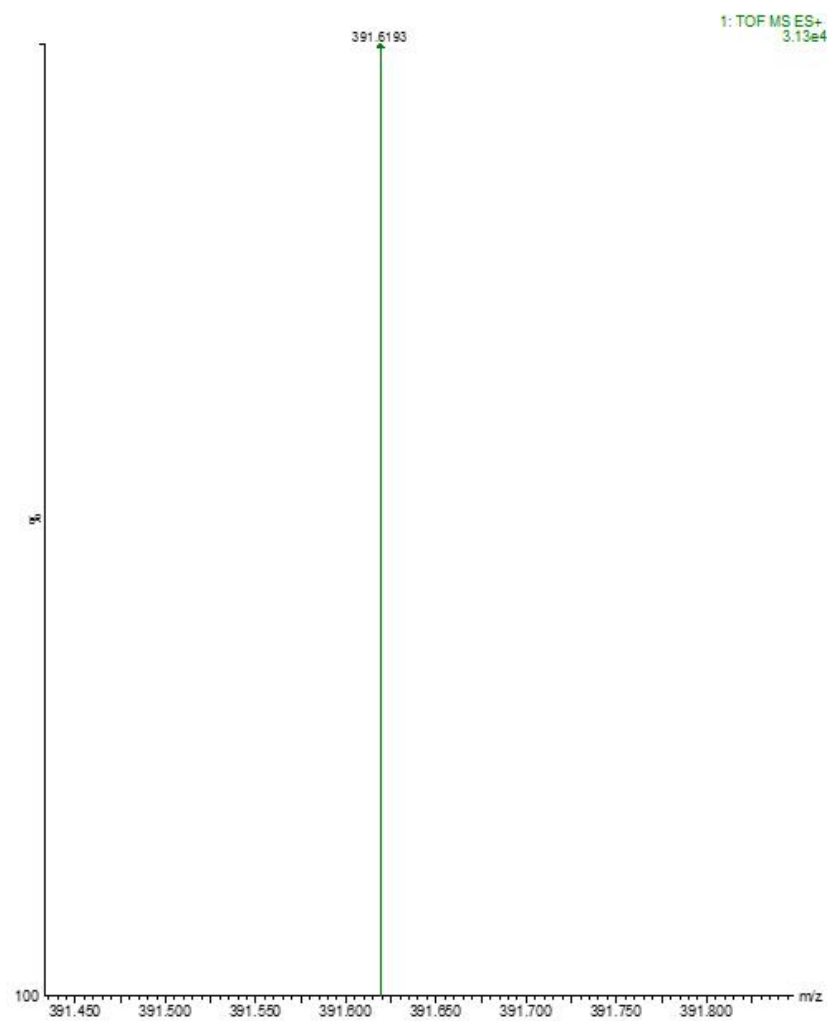

**Figure S45.** TOF MS of compound **11a**.

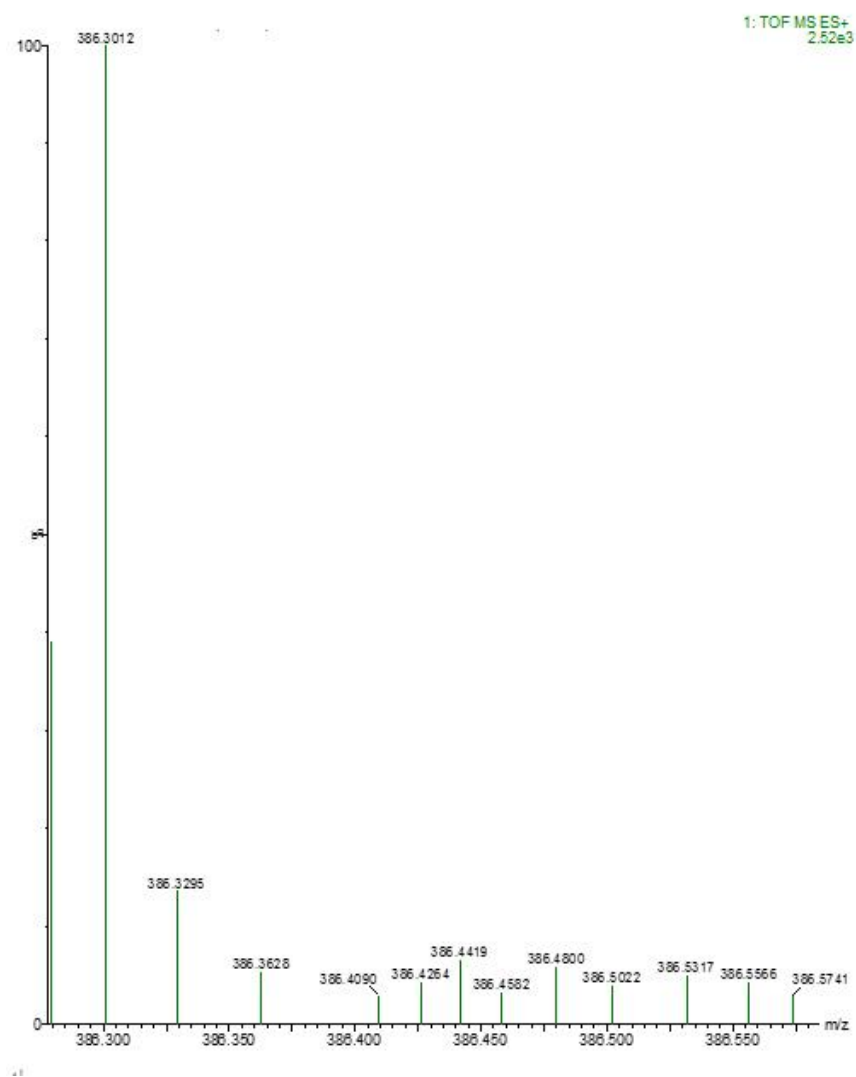

Figure S46. TOF MS of compound 11b.

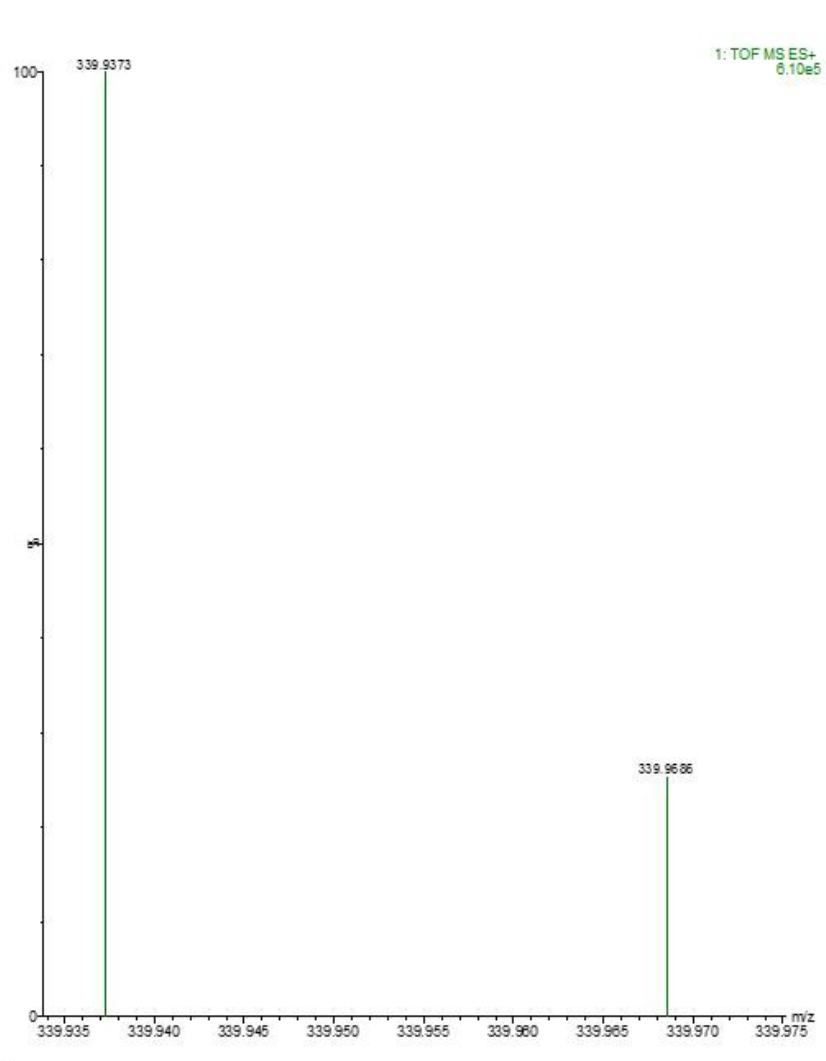

Figure S47. TOF MS of compound 17a.

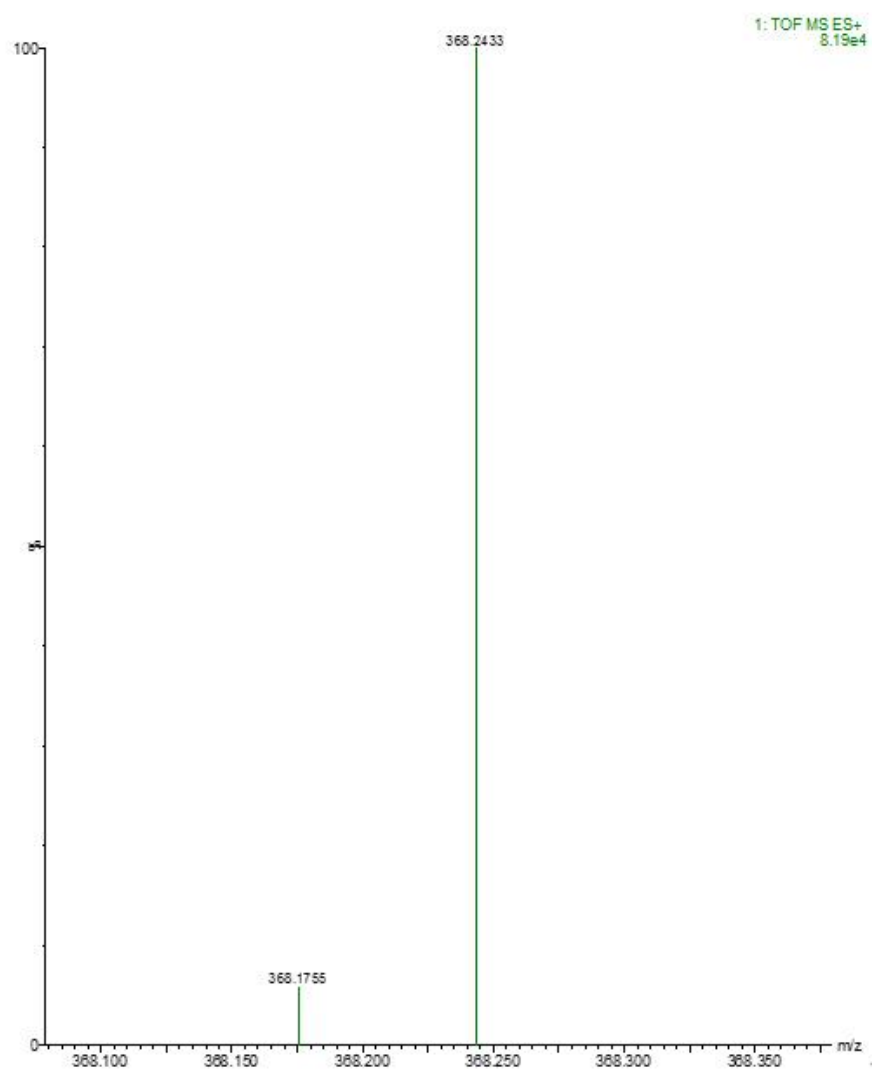

Figure S48. TOF MS of compound 17b.

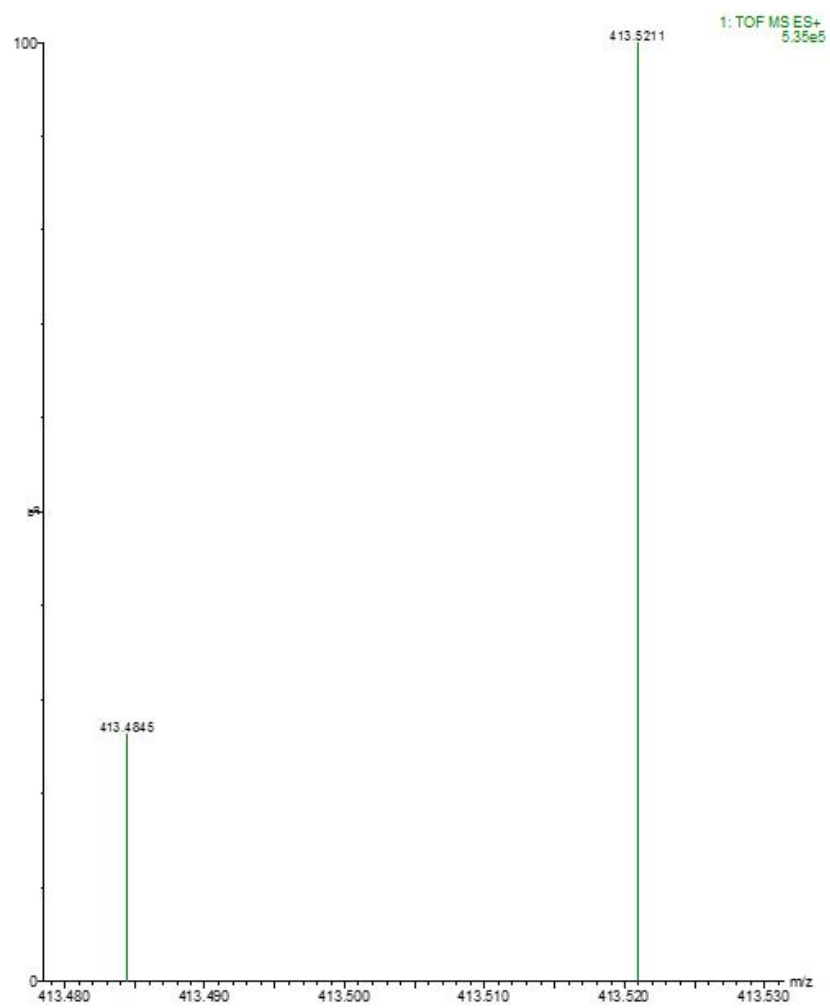

Figure S49. TOF MS of compound 18a.

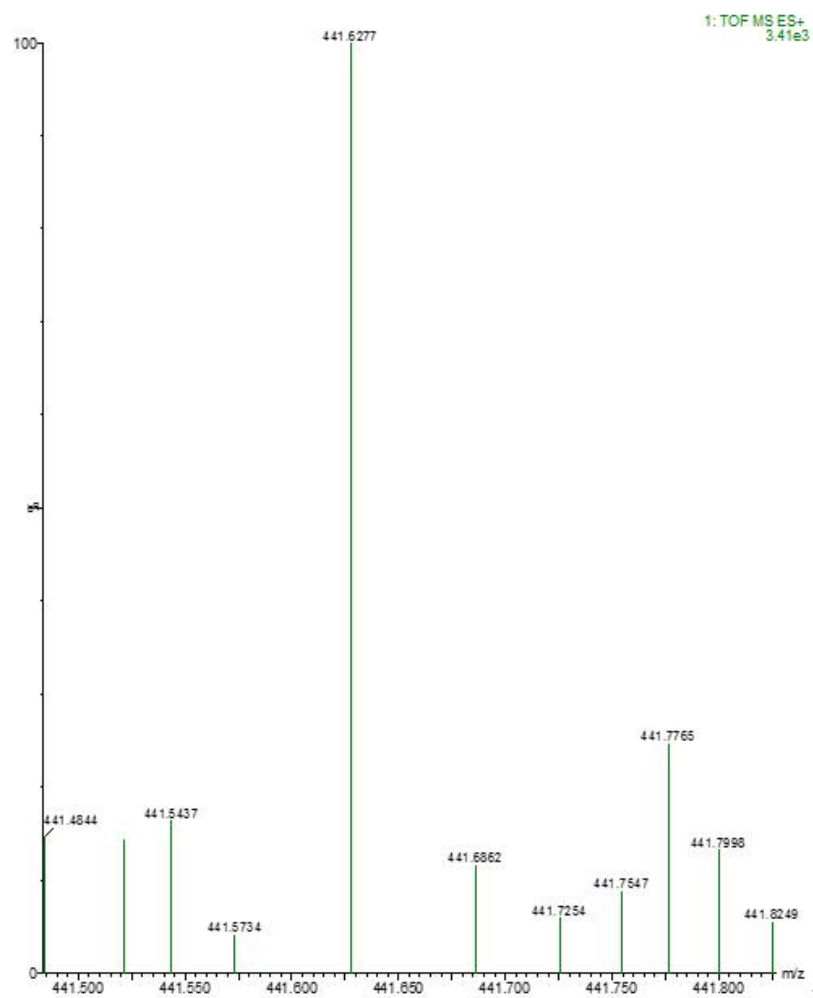

Figure S50. TOF MS of compound 18b.
